# Supplementary material for: Changes in the Expression of Proteins Associated with Neurodegeneration in the Brains of Mice after Infection with Influenza A Virus with Wild Type and Truncated NS1
Source: MDPI journal article supplement (doi:10.3390/ijms25052460), 2024-02-20
Supplement: s1 [file s1]

| <b>Sample</b> |                  |                    | <b>Total</b> |               | <b>Proper</b> |               |
|---------------|------------------|--------------------|--------------|---------------|---------------|---------------|
| <b>name</b>   | <b>Raw reads</b> | <b>Clean Reads</b> | <b>Map</b>   |               | <b>Map</b>    |               |
| Mock-1        | 45332750         | 44743638           | 39590302     | <b>88.48%</b> | 36178764      | <b>80.86%</b> |
| Mock-2        | 81332450         | 80048738           | 69686755     | <b>87.06%</b> | 58175438      | <b>72.68%</b> |
| WSN           | 39496130         | 39074648           | 36448824     | <b>93.28%</b> | 33729024      | <b>86.32%</b> |
| WSN           | 45434642         | 44840648           | 41708707     | <b>93.02%</b> | 37800180      | <b>84.3%</b>  |
| WSN           | 44262588         | 43624318           | 40572579     | <b>93.00%</b> | 37350580      | <b>85.62%</b> |
| WSN ad        | 39348744         | 38937330           | 36336954     | <b>93.32%</b> | 33220074      | <b>85.32%</b> |
| NS80          | 45552098         | 44983290           | 41681965     | <b>92.66%</b> | 38507578      | <b>85.6%</b>  |
| NS80          | 40565552         | 40076928           | 36917427     | <b>92.12%</b> | 34146938      | <b>85.2%</b>  |
| NS80          | 51294628         | 40739584           | 36615148     | <b>89.88%</b> | 33468954      | <b>82.15%</b> |
| NS80 ad       | 42170062         | 41539672           | 38674653     | <b>93.1%</b>  | 35616364      | <b>85.74%</b> |
| NS80 ad       | 50142384         | 49519296           | 45826736     | <b>92.54%</b> | 42299136      | <b>85.42%</b> |
| NS80 ad       | 43139690         | 42753362           | 39745264     | <b>92.96%</b> | 36903794      | <b>86.32%</b> |

**Table S1.** Summary of data obtained from the sequenced RNA-seq libraries.

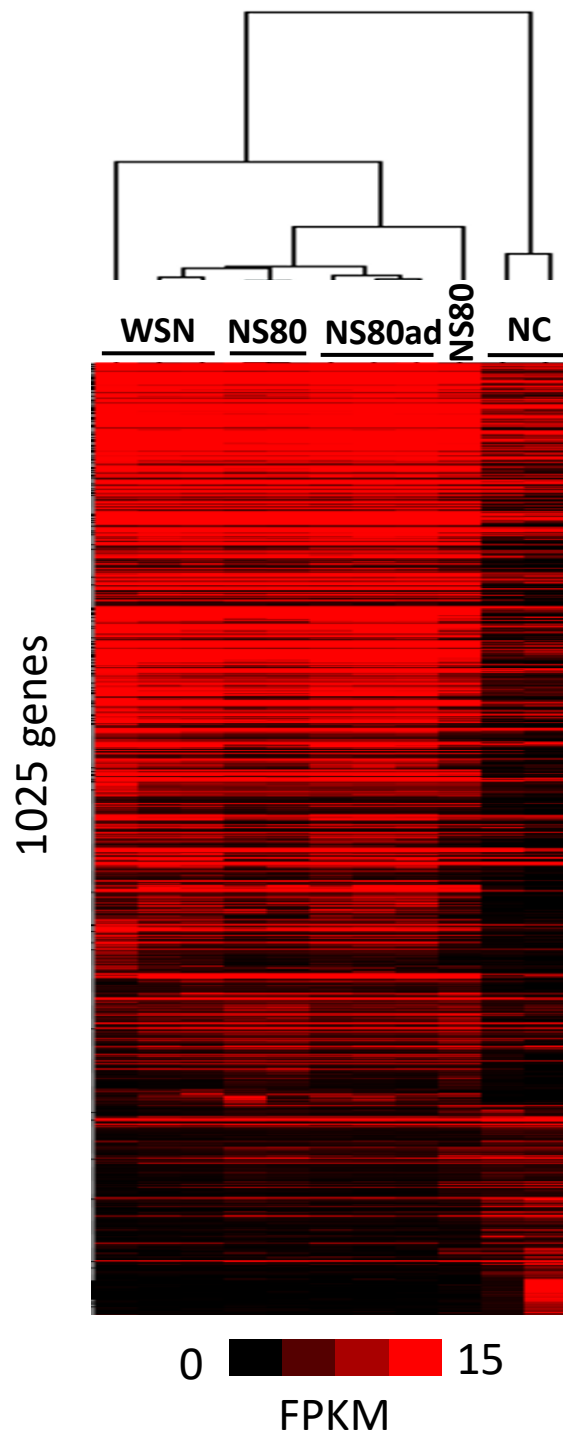

Figure S1. Hierarchical clustering of FPKM values from lungs infected with WSN, NS80, NS80ad and uninfected control (NC). Selection of 1025 genes was done by comparing expression value between WSN and NS80 infected cells relative to uninfected controls (Figure 2A).

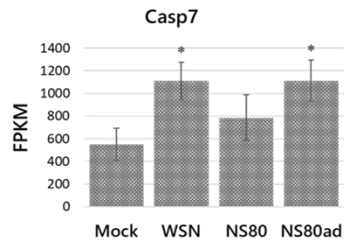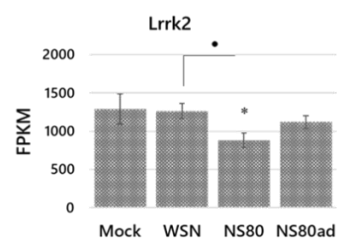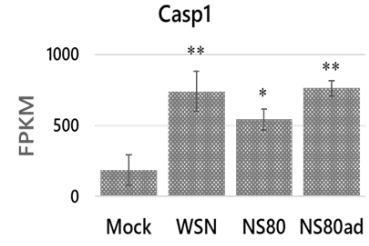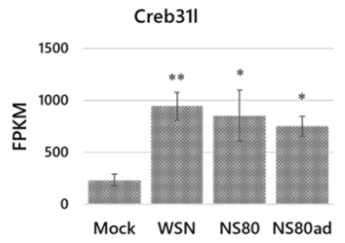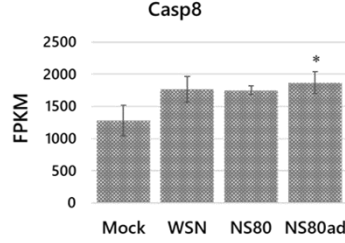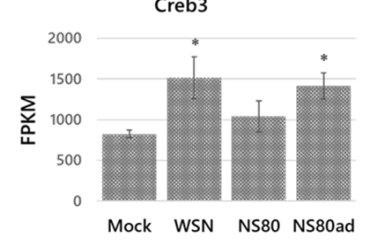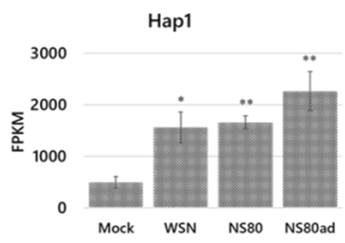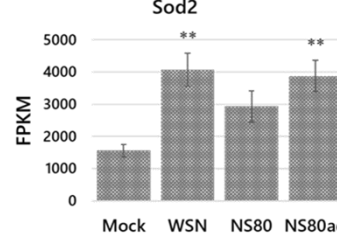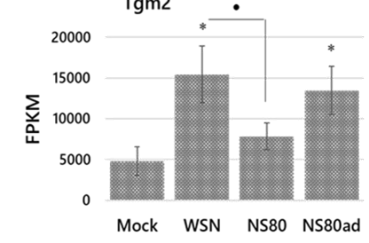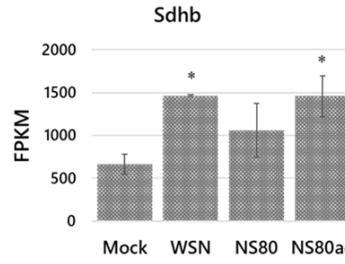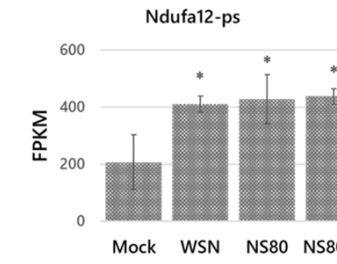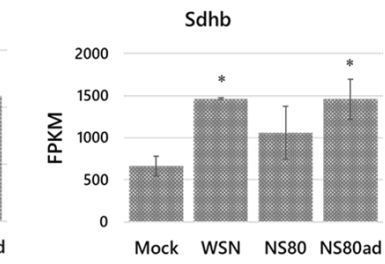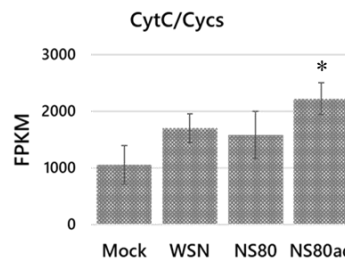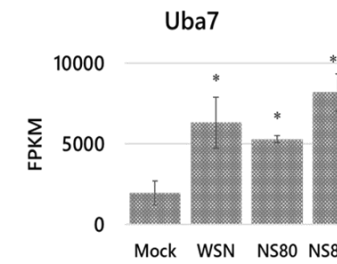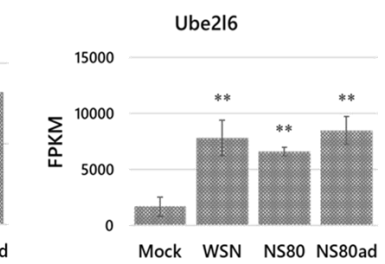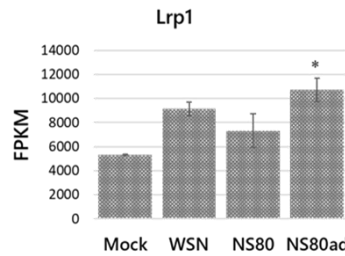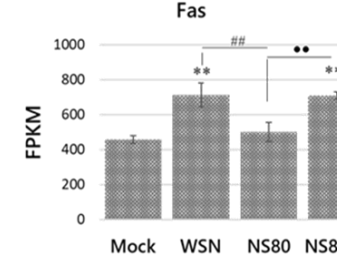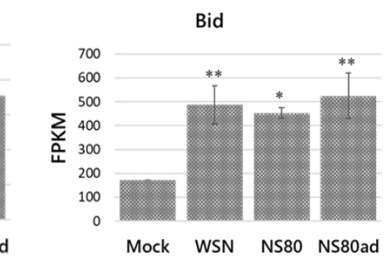

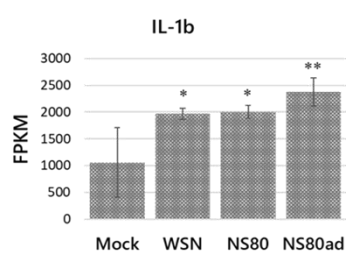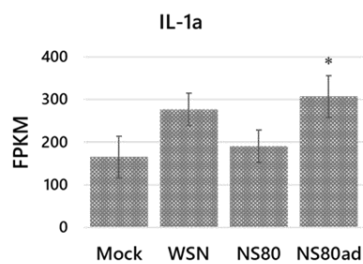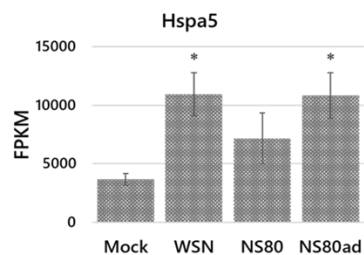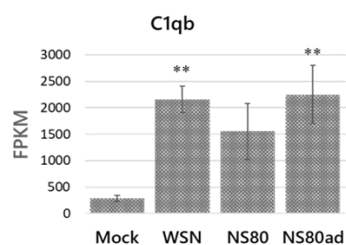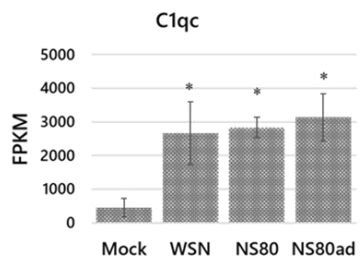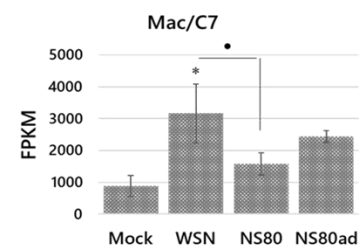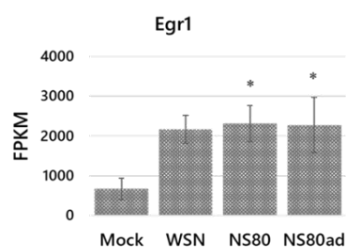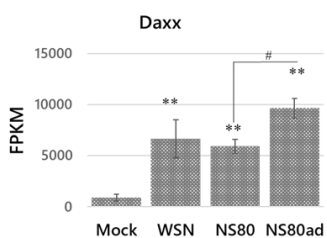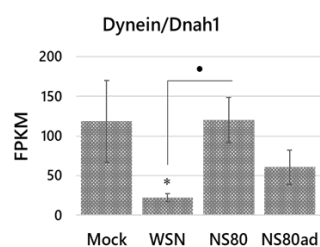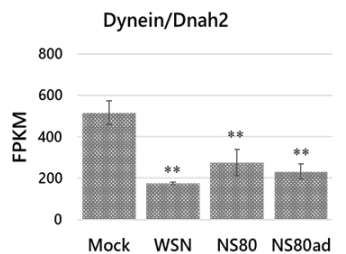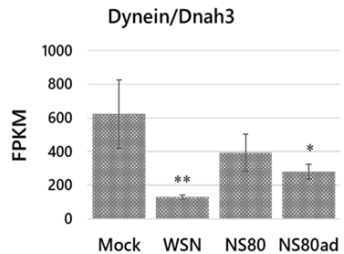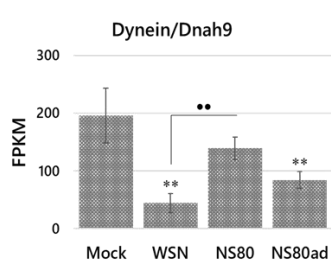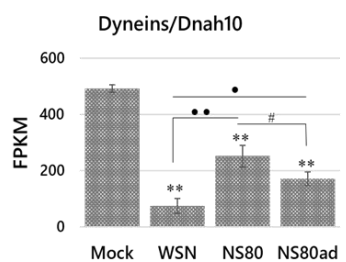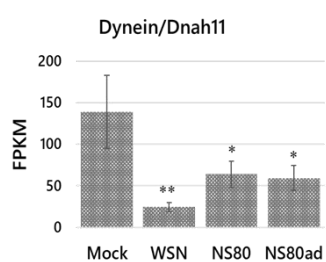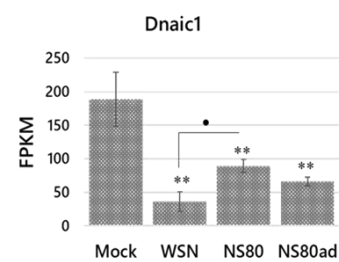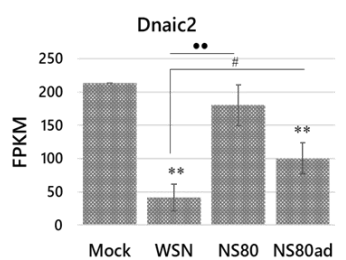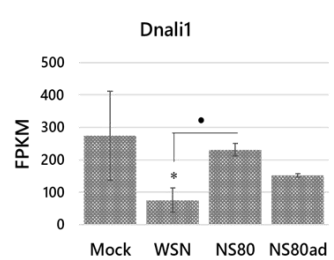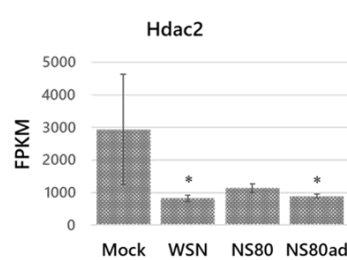

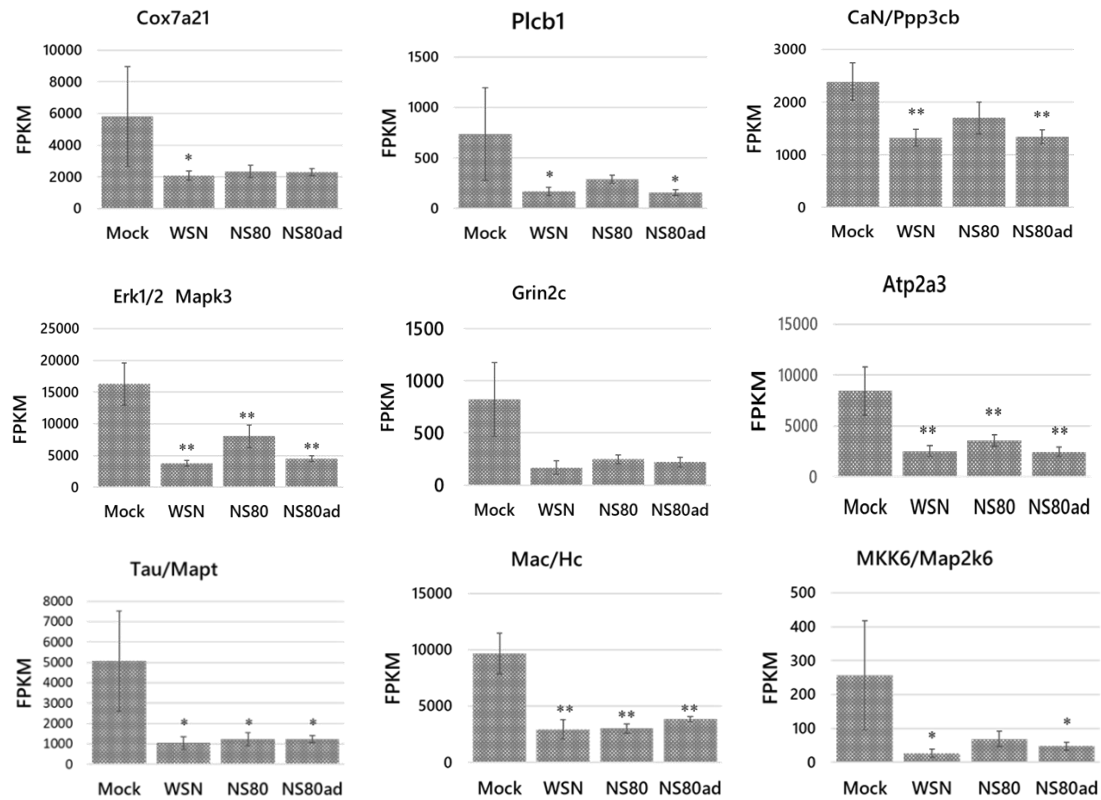

Figure S2. The FPKM values obtained from RNA seq data analyses from brains (n=3) infected with WSN (n=3), NS80 (n=3), and NS80ad(n=3). Data are presented as the mean  $\pm$  SD. Data were statistically evaluated using one-way ANOVA and post hoc Tukey's HSD test; #, •, \*  $p < 0.05$ ; ••, \*\*  $p < 0.01$ ; \*\*\*  $p < 0.001$ .
